# Supplementary material
Source: PubMed Central journal article supplement (PMC5225956)
Supplement: NIHMS837979-supplement-Supp_Figs_and_Tables.pdf [file NIHMS837979-supplement-Supp_Figs_and_Tables.pdf]

### A. Generating EMS mutant lines:

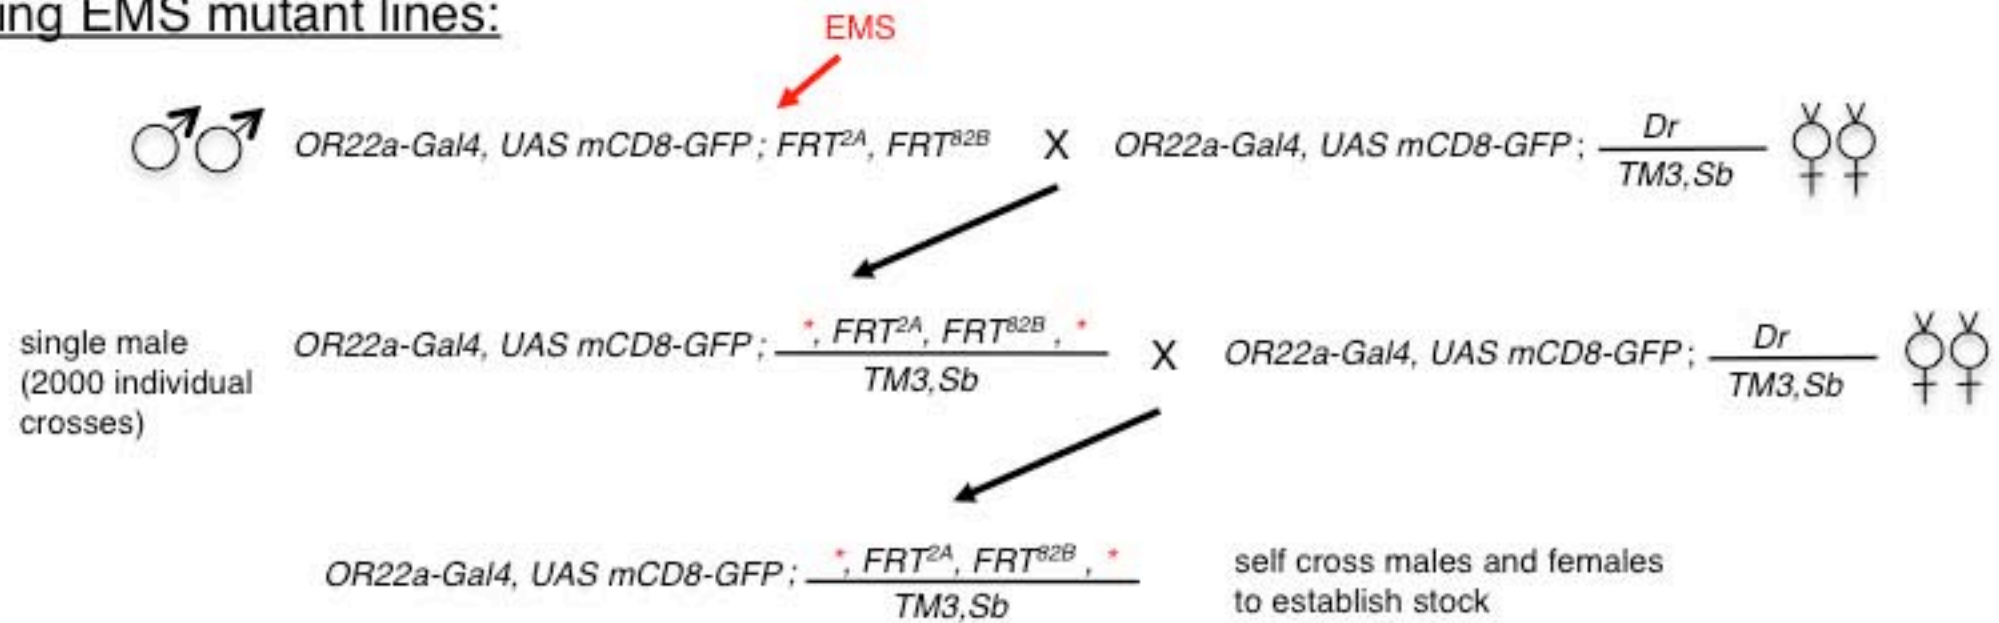

### B. MARCM crosses:

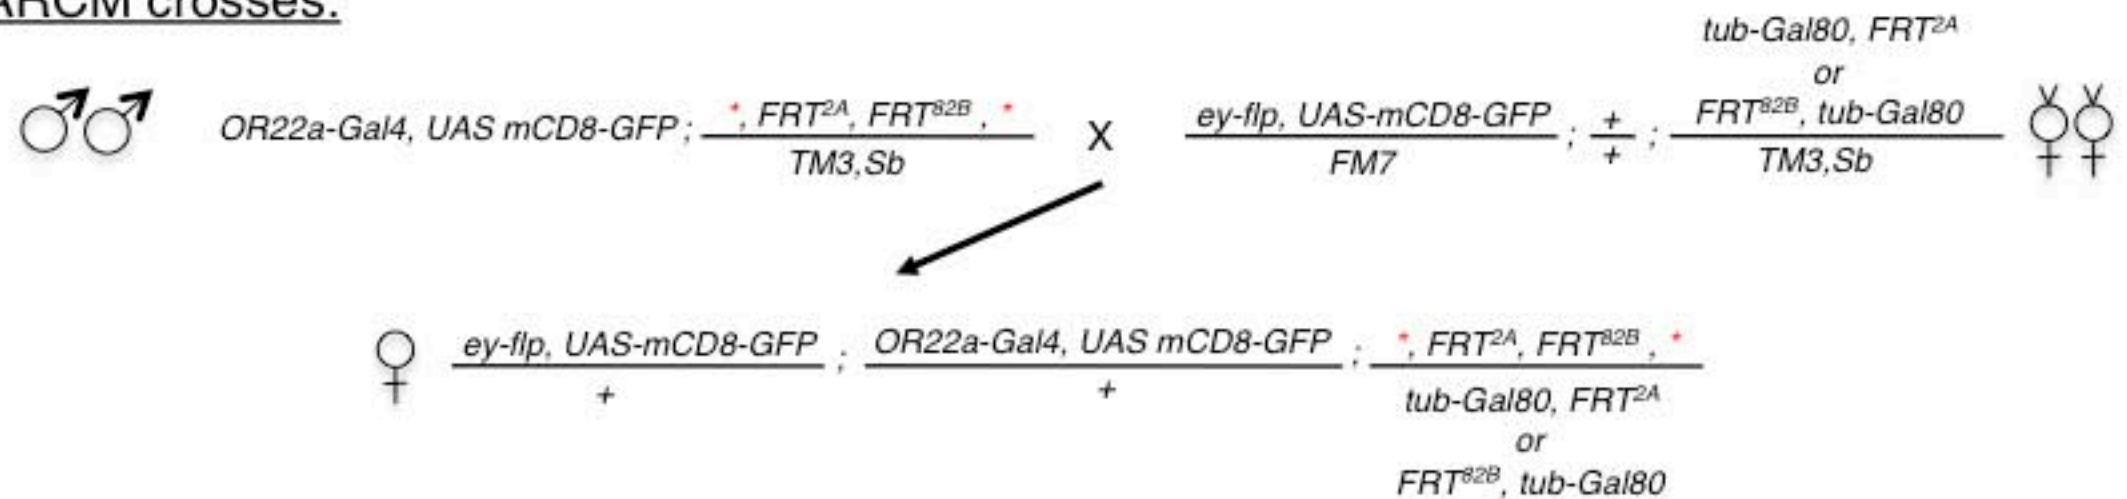

- 1) collect females only
- 2) clones generated in OR22a<sup>+</sup> ORN axons (by *ey-flp*)
- 3) unilateral ablation → assay severed axon integrity at 7 days

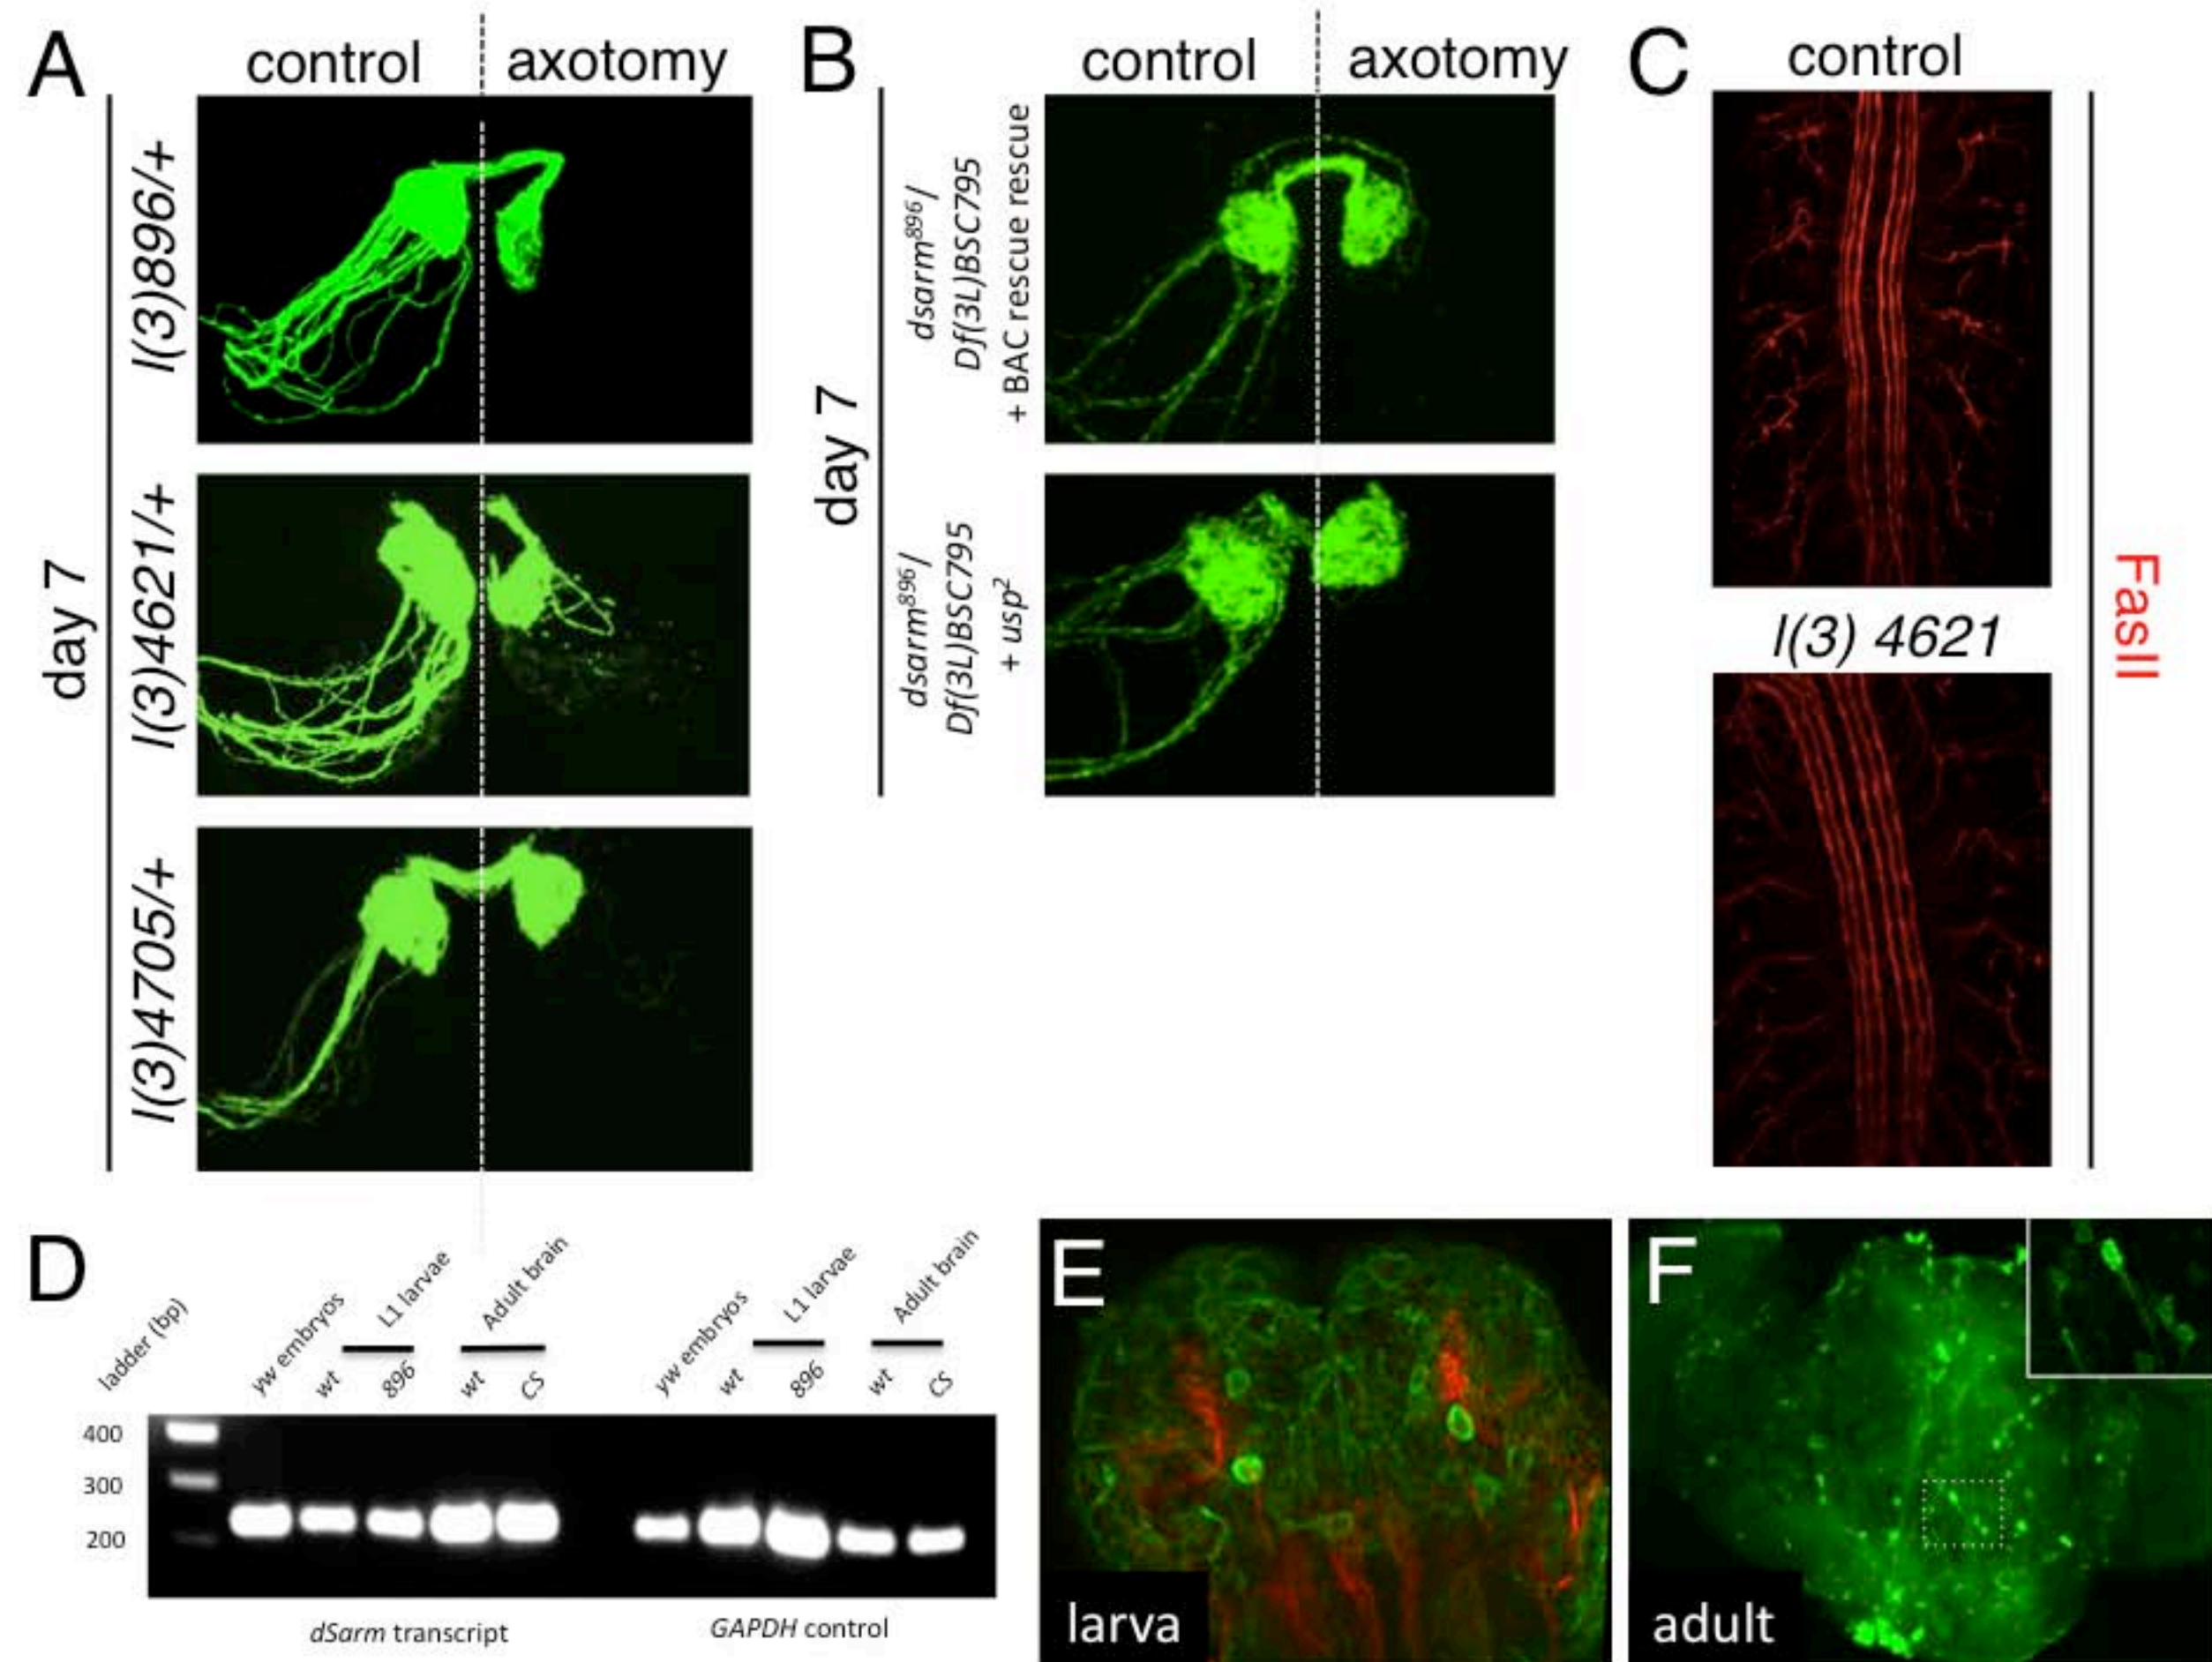

Supplementary Figure 2

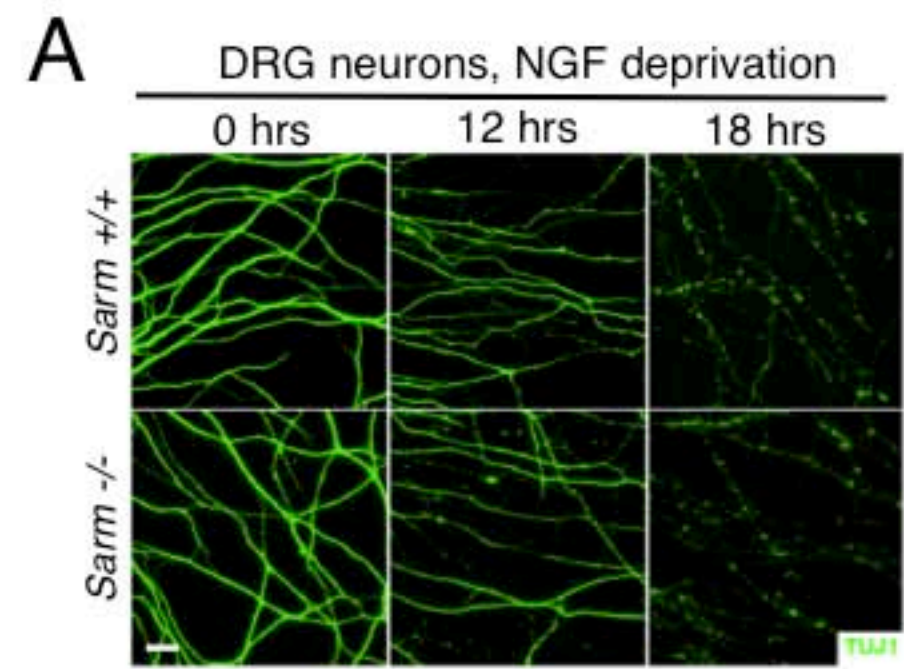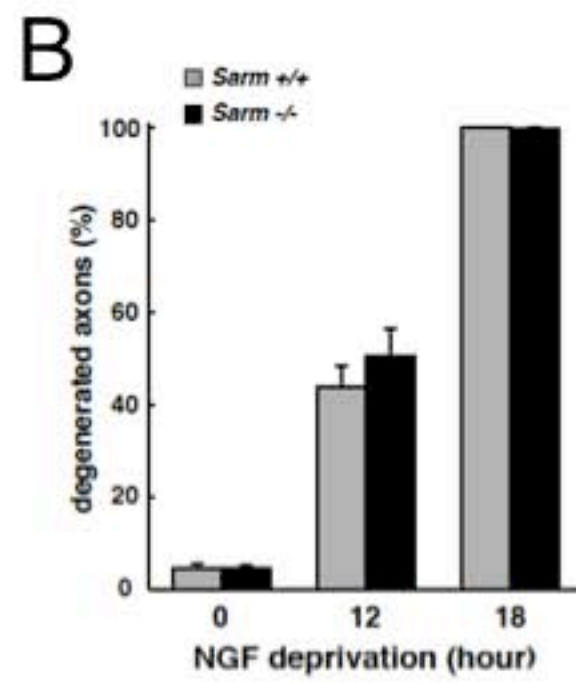

Supplementary  
Figure 3



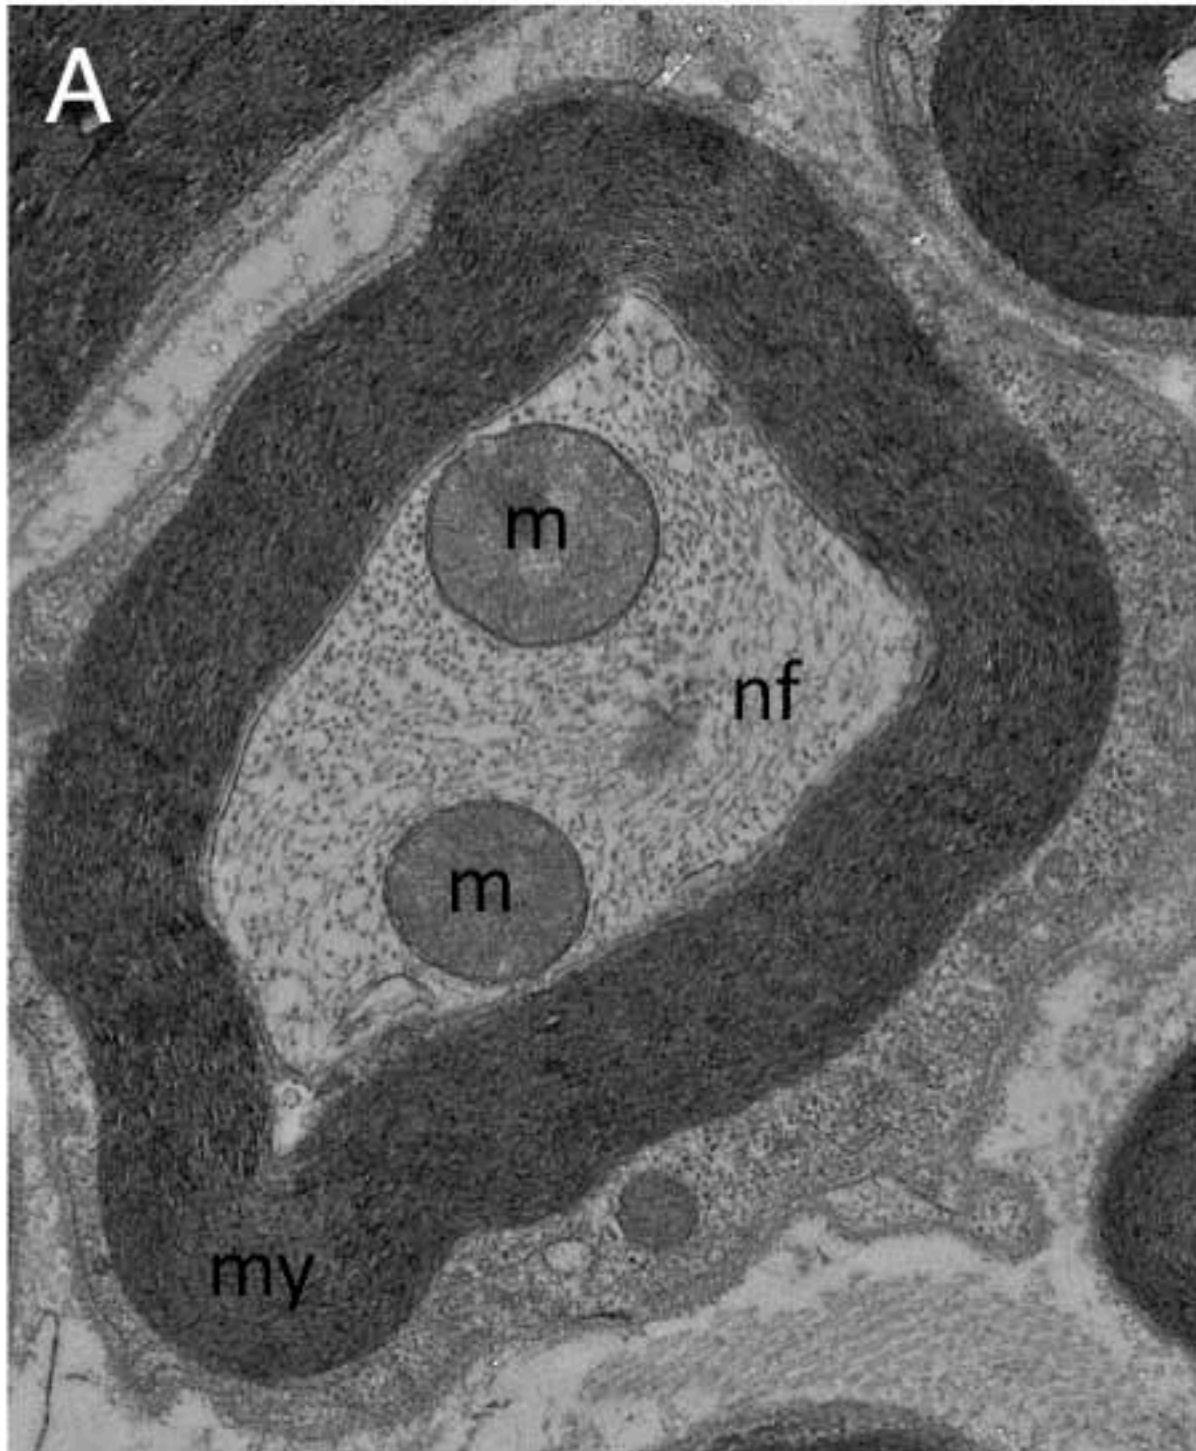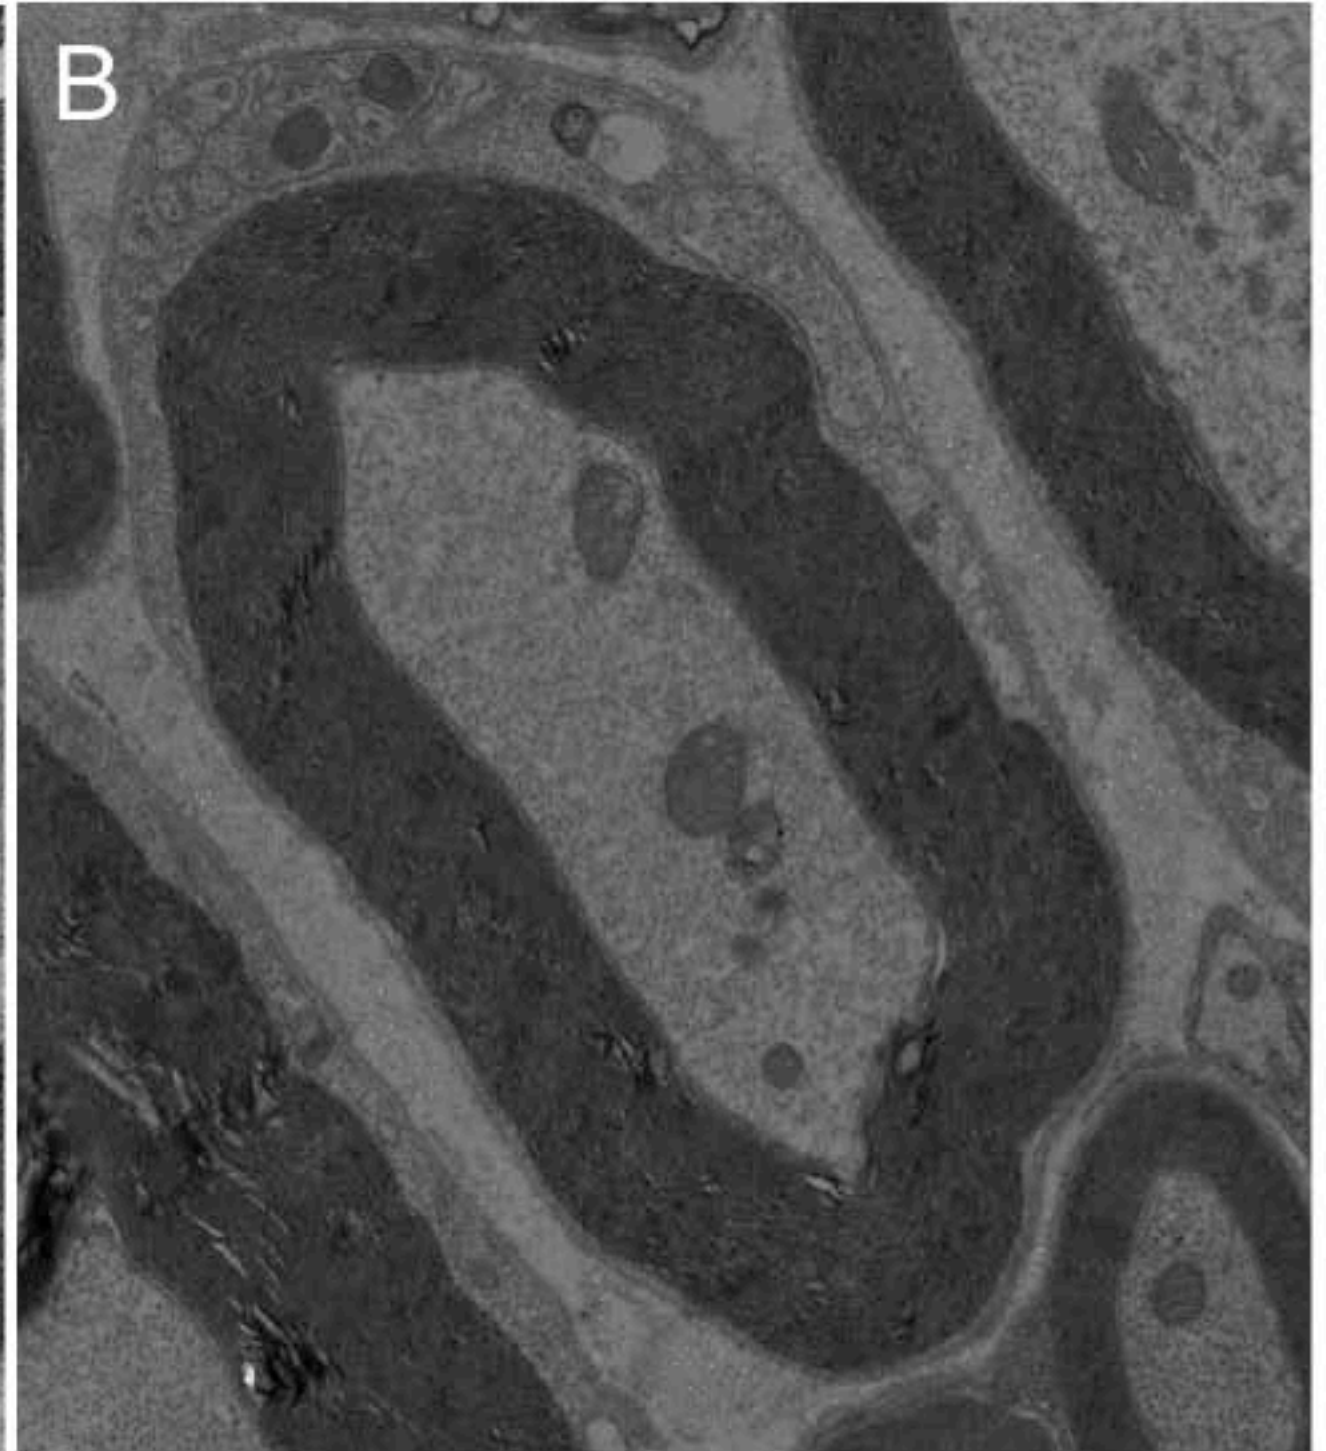

Supplementary Figure 4

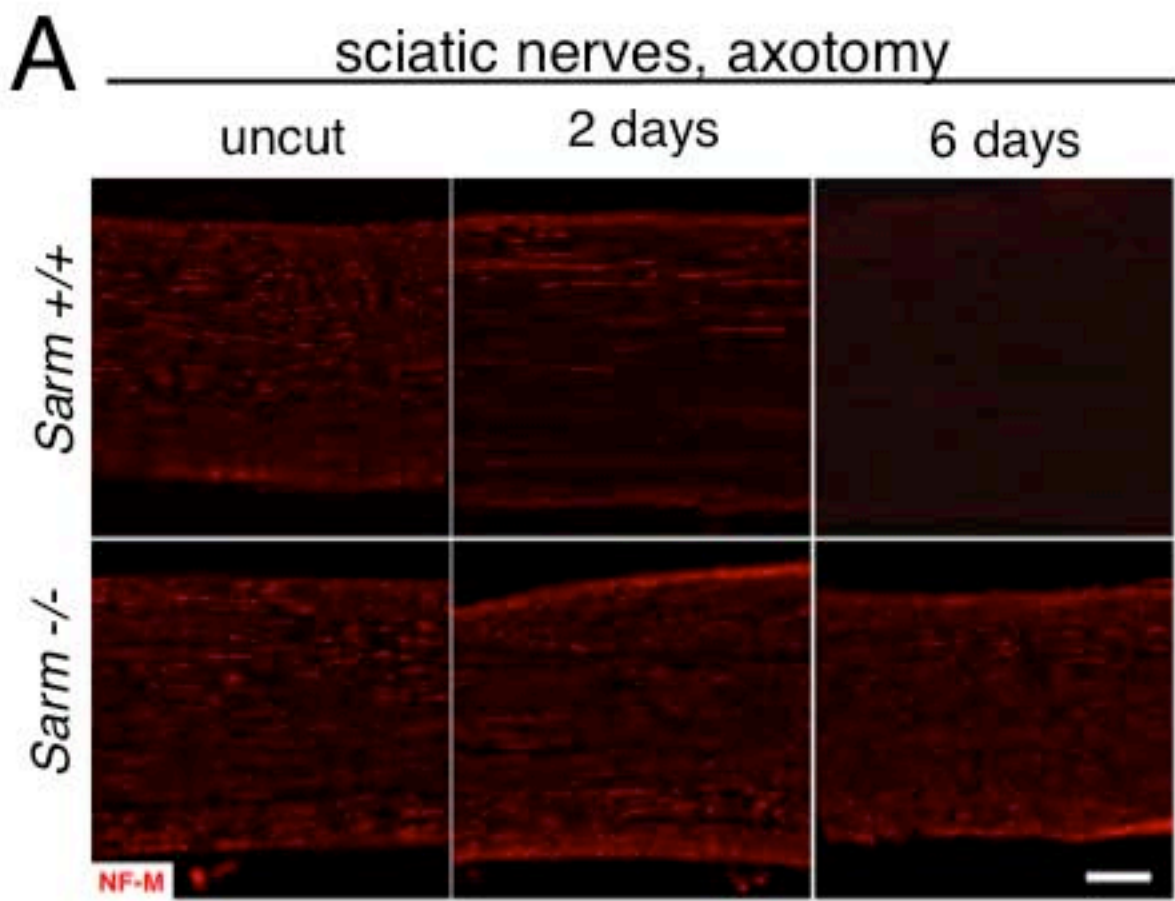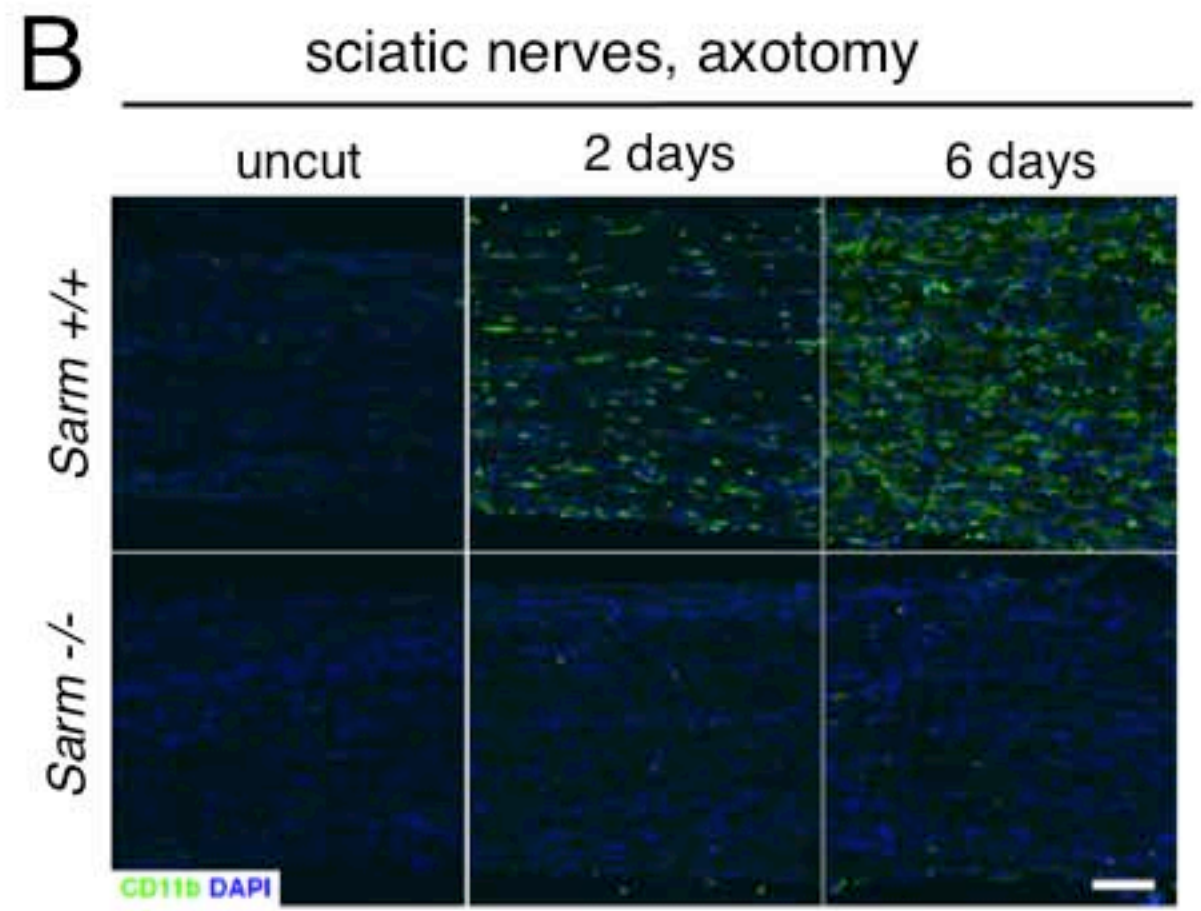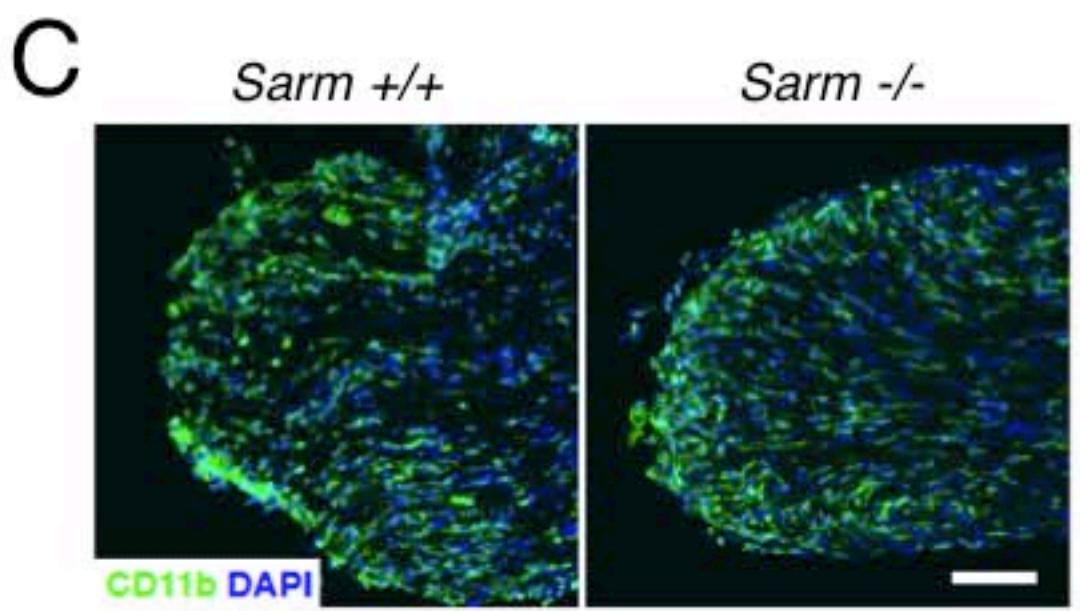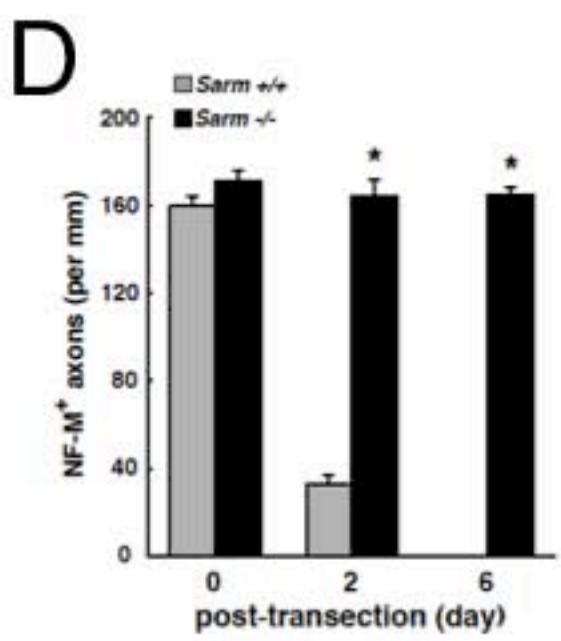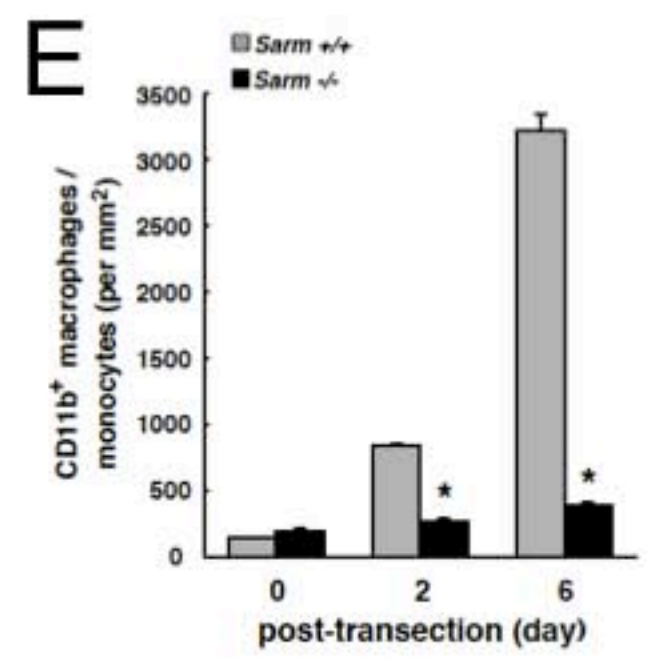

Supplementary Figure 5



## Supplementary Table 1: Mutants tested that fail to suppress Wallerian Degeneration

| Gene     | Mutant Allele | Allele Type |
|----------|---------------|-------------|
| ASK1     | DN            | OE          |
| Atg1     | $\Delta$ 3D   | LOF         |
| Atg1     | KQ #5B DN     | OE          |
| Atg1     | 68 DN         | OE          |
| Atg1     | EP3009        | LOF         |
| Atg1     | KG03098       | LOF         |
| Atg1     | EP3348        | LOF         |
| Atg2     | EP3697        | LOF         |
| Atg6     | 00096         | LOF         |
| Atg7     | d77           | LOF         |
| Atg7     | d14           | LOF         |
| Atg18    | KG03098       | LOF         |
| Bsk/Jnk  | DN            | OE          |
| buffy    | H37           | LOF         |
| cullin-3 | mds1          | LOF         |
| cullin-3 | UAS           | OE          |
| cyt-c d  | bln1          | LOF         |
| damm     | f02209        | LOF         |
| dark     | CD4           | hypomorph   |

| Gene        | Mutant Allele | Allele Type |
|-------------|---------------|-------------|
| dark        | CD8           | hypomorph   |
| debcl       | E36           | LOF         |
| debcl       | W105          | hypomorph   |
| diAP/thread | th1           | LOF         |
| diAP/thread | FL            | OE          |
| diAP2       | G2326         | OE          |
| Dronc       | DN            | OE          |
| Dronc       | 51            | LOF         |
| drp1        | KG03815       | LOF         |
| Hsp22       | EP(3)3247     | OE          |
| ik2         | DN            | OE          |
| omi/htra2   | FL            | OE          |
| omi/htra2   | $\Delta$ 07   | LOF         |
| p35         | FL            | OE          |
| pmn         | FL            | OE          |
| puckered    | FL            | OE          |
| roc1b       | dc3           | LOF         |
| SOD1        | FL            | OE          |
| TOR         | TED DN        | OE          |

All mutants or misexpression constructs were crossed into a background where a subset of ORNs were labeled with GFP. Constructs tested for overexpression phenotypes were co-expressed with GFP. ORN axons were severed, and axon degeneration and clearance from the brain was assayed 7 days after axotomy. LOF = reported amorphic loss of function allele; OE = overexpression construct; DN = dominant negative; FL = full length gene.

**Supplementary Table 2** – Production of MARCM clones and persistence of severed axons in mutant backgrounds

| <b>mosaic chromosome</b> | <b>number of axons (uninjured)*</b> | <b>number of axons 7 days after axotomy*</b> |
|--------------------------|-------------------------------------|----------------------------------------------|
| <i>wild type</i>         | 11.08 +/-1.52                       | 0                                            |
| <i>l(3)896</i>           | 4.71 +/-1.76                        | 5.43 +/-2.12                                 |
| <i>l(3)4621</i>          | 7.44 +/-0.66                        | 6.13 +/-0.74                                 |
| <i>l(3)4705</i>          | 4.94 +/-0.85                        | 5.00 +/-1.61                                 |

\*Represents number of individual axon fibers identified in z-stacks from confocal imaging of entire antennal lobe. n≥10 antennal lobes for all.

**Supplementary Table 3 – Identification of *dsarm* through re-sequencing of mutant genomes**

|                                                               | One mutant line<br>(# of genes)                   | Any two mutant<br>lines<br>(maximum # of<br>genes) | All three mutant lines<br>(# of genes) |
|---------------------------------------------------------------|---------------------------------------------------|----------------------------------------------------|----------------------------------------|
| Unique coding variants;<br>genome wide                        | 92 (I(3)896)<br>997 (I(3)46210)<br>272 (I(3)4705) | 166                                                | 6                                      |
| Unique coding variants;<br>chromosome 3L                      | 34 (I(3)896)<br>132 (I(3)46210)<br>46 (I(3)4705)  | 8                                                  | 3                                      |
| + nonsynonymous<br>or splice site and<br>heterozygous changes | 17 (I(3)896)<br>66 (I(3)46210)<br>23 (I(3)4705)   | 2                                                  | 1                                      |
